# Supplementary material
Source: Springer Nature journal article supplement (https://www.springermedizin.de/resource/supplementary/13024_2014_526_MOESM6_ESM.pdf/9644318)
Supplement: MOESM6 [file 9644318]

**Table 1: Demographics**

| <b>Control</b>    | <b>PMI</b> | <b>Age of death</b> | <b>ApoE</b> | <b>Gender</b> | <b>BRAAK</b> | <b>Age onset</b> | <b>Mutation</b> |
|-------------------|------------|---------------------|-------------|---------------|--------------|------------------|-----------------|
| BLSA-1313         | n/a        | 92                  | 3/3         | f             | II           |                  |                 |
| BLSA-1471         | n/a        | 87                  | 2/3         | m             | II           |                  |                 |
| BLSA-1517         | 16         | 71                  | 4/4         | f             | II           |                  |                 |
| BLSA-2027         | 7          | 86                  | 2/3         | m             | IV           |                  |                 |
| BLSA-2066         | 17         | 95                  | 2/3         | m             | III          |                  |                 |
| <b>AD (PS-1):</b> |            |                     |             |               |              |                  |                 |
| E10-110           | 42         | 47                  | 3/3         | m             | VI           | 30               | M146V           |
| UW-24             | 3.5        | 46                  | n/a         | m             | VI           | 39               | G209V           |
| UW-238            | <24        | 51                  | n/a         | f             | V            | 41               | G209V           |
| UW-301            | 7          | 37                  | n/a         | m             | VI           | 31               | I143T           |
| UW-304            | <24        | 58                  | n/a         | m             | V            | 48               | G209V           |
| UW-328            | 17.5       | 44                  | n/a         | f             | VI           | 38               | A260V           |
| <b>AD (APP):</b>  |            |                     |             |               |              |                  |                 |
| E12-24            | 5.5        | 54                  | 3/3         | m             | VI           | 45               | V717I           |
| UW-16514          | n/a        | 72                  | n/a         | f             | VI           | 62               | E693G           |
| <b>Down:</b>      |            |                     |             |               |              |                  |                 |
| 1                 | 20         | 40                  | n/a         | m             | n/a          |                  |                 |
| 2                 | 8          | 44                  | n/a         | f             | n/a          |                  |                 |
| 3                 | 3          | 46                  | n/a         | m             | n/a          |                  |                 |
| 4                 | 5          | 47                  | n/a         | f             | n/a          |                  |                 |
| 5                 | 4.5        | 59                  | n/a         | f             | n/a          |                  |                 |
| 6                 | 15         | 60                  | n/a         | f             | n/a          |                  |                 |

n/a: not available; BLSA: Baltimore Longitudinal Study of Aging; E: Emory; UW: University of Washington; Down syndrome cases from Rush University
